# Supplementary material for: ZnO nanoparticles as an antimicrobial tissue adhesive for skin wound closure
Source: Royal Society of Chemistry journal article supplement (doi:10.1039/c7tb00664k), 2017-01-01
Supplement: c7tb00664k3.pdf [file c7tb00664k3.pdf]

**Supporting Information for**

**ZnO nanoparticles as an antimicrobial tissue adhesive for  
skin wound closure**

Yu Gao<sup>a#</sup>, Yiyuan Han<sup>b#</sup>, Mingyue Cui<sup>b</sup>, Hong Liang Tey<sup>c,d</sup>, Lianhui Wang<sup>a\*</sup>,  
Chenjie Xu<sup>b,e\*</sup>

<sup>a</sup> Key Laboratory for Organic Electronics and Information Displays & Institute of Advanced Materials (IAM), Jiangsu National Synergistic Innovation Center for Advanced Materials (SICAM), Nanjing University of Posts & Telecommunications, 9 Wenyuan Road, Nanjing 210023, China

<sup>b</sup> School of Chemical and Biomedical Engineering, Nanyang Technological University, 70 Nanyang Drive, Singapore 637457

<sup>c</sup> National Skin Centre, 1 Mandalay Rd, Singapore 308205

<sup>d</sup> Lee Kong Chian School of Medicine, Nanyang Technological University, 59 Nanyang Drive, Singapore 636921

<sup>e</sup> NTU-Northwestern Institute for Nanomedicine, Nanyang Technological University, 50 Nanyang Avenue, Singapore 639798

<sup>#</sup> These author contribute equally to this work

<sup>\*</sup> Correspondence: iamlhwang@njupt.edu.cn or cjxu@ntu.edu.sg

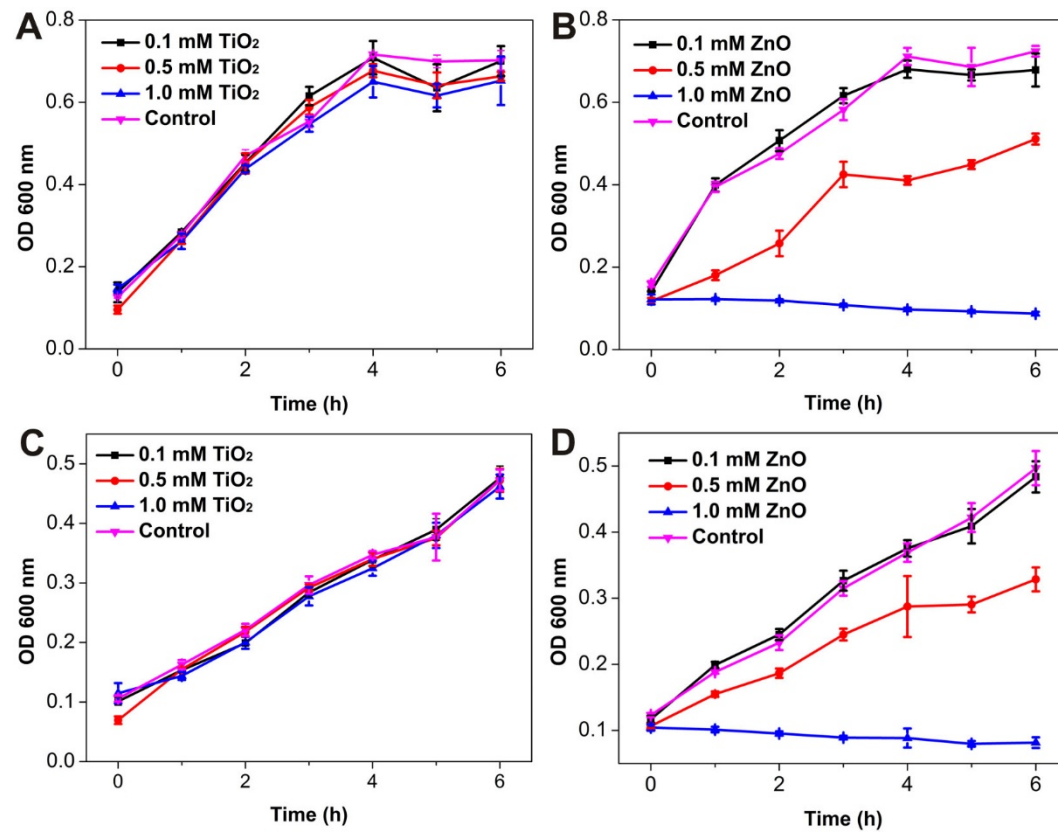

**Figure S1.** Antimicrobial effects of TiO<sub>2</sub> and ZnO nanoparticle. Antimicrobial assay of (A) TiO<sub>2</sub> nanoparticles and (B) ZnO nanoparticles against *E.coli*. ATCC25922. Antimicrobial assay of (C) TiO<sub>2</sub> nanoparticles and (D) ZnO nanoparticles against *E.coli*. DH5a.

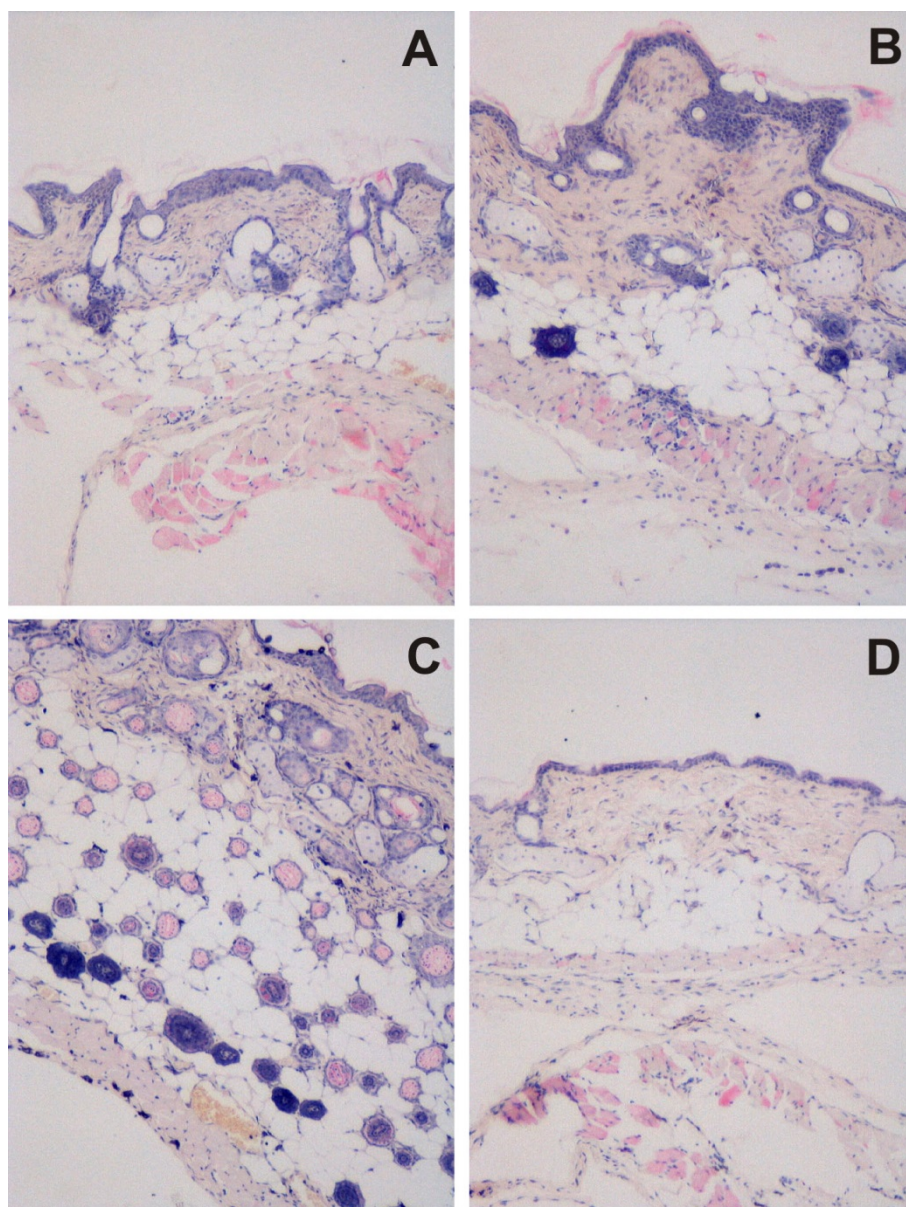

**Figure S2.** Wound healing of full thickness cutaneous incisions on nude mice model at day 9. Representative histological images of the wound healing treated by (A) commercial topical skin adhesive (Histoacryl®) and (B) SiO<sub>2</sub>, (C) TiO<sub>2</sub>, and (D) ZnO nanoparticles, respectively.

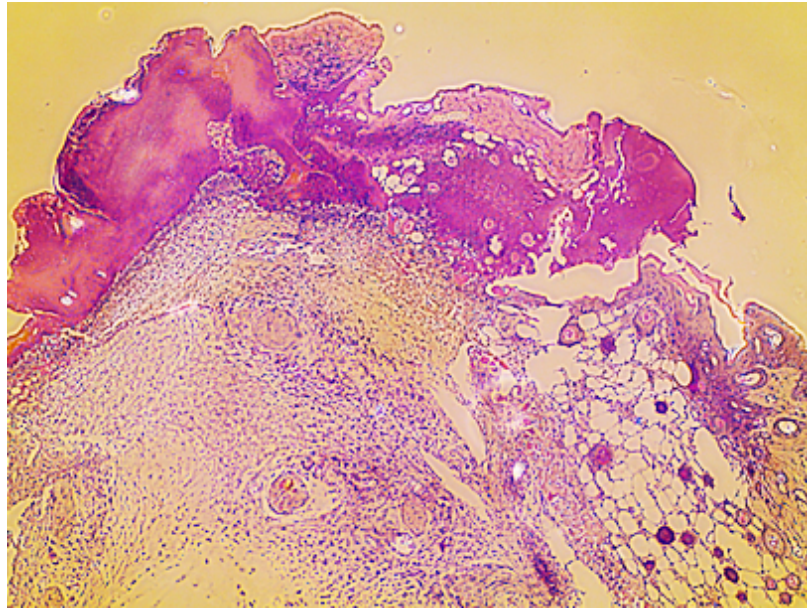

**Figure S3.** Full thickness cutaneous incisions on nude mice model at day 3.
